# Supplementary material for: Establishment and validation of a method for determining anti-Xa factor potency of enoxaparin sodium
Source: PeerJ. 2025 May 6;13:e19437. doi: 10.7717/peerj.19437 (PMC12063604; doi:10.7717/peerj.19437)
Supplement: Supplemental Information 1 [file peerj-13-19437-s001.xlsx]

## Sheet: Arrangement of the solutions
Blank	S4	S3	S2	S1
	T4	T3	T2	T1
	T4	T3	T2	T1
Blank	S4	S3	S2	S1

## Sheet: Raw data
Supplemental Table: Absorbance values measured for each solution
ID		S1	S2	S3	S4	T1	T2	T3	T4	T1	T2	T3	T4	S1	S2	S3	S4
Robustness	P0 (Initial)	0.2312	0.3197	0.4278	0.5214	0.228	0.3098	0.4216	0.5245	0.22	0.3124	0.4109	0.5095	0.2267	0.3073	0.434	0.53
	P1（+15sec）	0.1773	0.2513	0.3646	0.4588	0.1801	0.2526	0.3493	0.4509	0.1832	0.2564	0.3486	0.4522	0.1809	0.2602	0.3495	0.459
	P4（-15sec）	0.2139	0.3019	0.3953	0.5166	0.2069	0.2992	0.3965	0.5029	0.213	0.2989	0.3984	0.5003	0.216	0.2968	0.3982	0.5099
	P2（+2℃）	0.2162	0.3047	0.3983	0.5186	0.2106	0.3043	0.4006	0.5078	0.2146	0.3041	0.4037	0.5067	0.2172	0.3015	0.4052	0.5151
	P3（-2℃）	0.1999	0.2825	0.3653	0.4595	0.1982	0.2667	0.3738	0.4518	0.1941	0.2685	0.3736	0.4598	0.2045	0.278	0.3725	0.4709
	P0hr	0.1337	0.1797	0.2466	0.3188	0.1363	0.1795	0.2475	0.3177	0.1405	0.1839	0.2469	0.3279	0.139	0.1854	0.2502	0.3251
	P24hr	0.2312	0.3197	0.4278	0.5214	0.228	0.3098	0.4216	0.5245	0.22	0.3124	0.4109	0.5095	0.2267	0.3073	0.434	0.53
Repeatability	Re1	0.2252	0.3177	0.4588	0.6088	0.231	0.3241	0.4508	0.6141	0.2252	0.3237	0.4437	0.6074	0.2285	0.3134	0.4569	0.6138
	Re2	0.2468	0.3372	0.4342	0.5536	0.2393	0.3251	0.4067	0.5438	0.24	0.3337	0.431	0.5501	0.2533	0.3335	0.4338	0.553
	Re3	0.2296	0.3193	0.4596	0.6102	0.2286	0.3203	0.46	0.6204	0.2231	0.2745	0.4613	0.5731	0.2246	0.2798	0.4503	0.5728
	Re4	0.1666	0.2524	0.3324	0.4646	0.168	0.2475	0.3274	0.4398	0.1693	0.2504	0.3225	0.4329	0.1636	0.2581	0.3179	0.4446
	Re5	0.2492	0.3338	0.4345	0.5538	0.2488	0.3322	0.4317	0.5464	0.243	0.336	0.4322	0.5526	0.2423	0.337	0.4343	0.5527
	Re6	0.2111	0.2938	0.3798	0.5065	0.2074	0.2847	0.3782	0.4937	0.212	0.2926	0.3809	0.4982	0.2277	0.2972	0.396	0.5025
Control Tests	Re1	0.214	0.356	0.455	0.55	0.232	0.354	0.458	0.541	0.205	0.355	0.458	0.571	0.229	0.356	0.458	0.596
	Re2	0.229	0.338	0.455	0.553	0.246	0.351	0.46	0.551	0.209	0.33	0.45	0.536	0.226	0.368	0.449	0.539
	Re3	0.225	0.357	0.46	0.545	0.215	0.351	0.481	0.57	0.223	0.335	0.461	0.548	0.255	0.334	0.45	0.565
	Re4	0.218	0.325	0.442	0.535	0.215	0.332	0.466	0.551	0.203	0.323	0.458	0.53	0.238	0.341	0.428	0.558
	Re5	0.208	0.341	0.44	0.556	0.218	0.345	0.46	0.571	0.205	0.331	0.447	0.542	0.222	0.328	0.4554	0.568
	Re6	0.223	0.33	0.455	0.558	0.218	0.345	0.465	0.555	0.204	0.356	0.437	0.541	0.238	0.345	0.436	0.554
Intermediate Precision	Re1	0.2396	0.3156	0.4161	0.5274	0.2317	0.3073	0.404	0.53	0.2377	0.3048	0.399	0.5093	0.2407	0.3121	0.4236	0.5034
	Re2	0.1601	0.1996	0.2837	0.3772	0.1548	0.1991	0.2729	0.3675	0.1555	0.1954	0.2723	0.3722	0.1614	0.1966	0.2775	0.3765
	Re3	0.2224	0.3101	0.4253	0.5358	0.2274	0.3053	0.4305	0.5352	0.219	0.3198	0.419	0.5375	0.2177	0.3055	0.4282	0.5386
	Re4	0.1912	0.2592	0.3482	0.4474	0.1906	0.257	0.3448	0.439	0.1863	0.2528	0.3432	0.4341	0.1965	0.2603	0.3468	0.4335
	Re5	0.2504	0.304	0.4052	0.5181	0.2413	0.3047	0.4108	0.5294	0.2375	0.3043	0.3964	0.5091	0.2313	0.299	0.3946	0.5037
	Re6	0.1985	0.2648	0.3587	0.4782	0.2036	0.267	0.3667	0.4833	0.2094	0.2617	0.3632	0.4729	0.2038	0.2579	0.3602	0.4592
Accuracy	SP0 (Initial)	0.2312	0.3197	0.4278	0.5214	0.228	0.3098	0.4216	0.5245	0.22	0.3124	0.4109	0.5095	0.2267	0.3073	0.434	0.53
	PB1 (Spiking 1)	0.1932	0.2695	0.3757	0.4804	0.2014	0.2856	0.3878	0.4938	0.2047	0.2869	0.3932	0.4991	0.198	0.273	0.3835	0.4825
	PB2 (Spiking 2)	0.1986	0.2765	0.3832	0.4927	0.2064	0.2887	0.3958	0.4941	0.2048	0.2841	0.3818	0.4969	0.1903	0.2655	0.3661	0.4784
	PB3 (Spiking 3)	0.3383	0.4628	0.5617	0.6937	0.3422	0.4617	0.5751	0.6911	0.3547	0.4735	0.5801	0.6978	0.3496	0.4558	0.6003	0.6924
	PB4 (Spiking 4)	0.1779	0.2486	0.3352	0.4469	0.1839	0.2506	0.3294	0.4532	0.188	0.257	0.3384	0.4569	0.1773	0.2382	0.3272	0.4373
	PB5 (Spiking 5)	0.2006	0.2649	0.3411	0.4428	0.2163	0.2723	0.3472	0.4504	0.2194	0.2708	0.3543	0.4519	0.2075	0.2721	0.3598	0.4541
	PB6 (Spiking 6)	0.2041	0.2722	0.3527	0.4491	0.2092	0.2782	0.3512	0.4475	0.2107	0.2681	0.341	0.4496	0.1987	0.2531	0.3366	0.4364
